# Supplementary material
Source: ML conference proceedings conference paper supplement (https://openreview.net/forum?id=g-I_qqceH2n)
Supplement: supplementary_material [file attachment]

---

# Communication-efficient distributed eigenspace estimation with arbitrary node failures

## Supplementary material

---

**Vasileios Charisopoulos**  
Operations Research & Information Engineering  
Cornell University  
Ithaca, NY 14853  
vc333@cornell.edu

Anil Damle  
Computer Science  
Cornell University  
Ithaca, NY 14853  
damle@cornell.edu

### Contents

|                                      |           |
|--------------------------------------|-----------|
| <b>A Auxiliary results</b>           | <b>1</b>  |
| <b>B Additional proofs</b>           | <b>3</b>  |
| B.1 Proof of Proposition 1 . . . . . | 3         |
| B.2 Proof of Lemma 1 . . . . .       | 3         |
| B.3 Proof of Proposition 3 . . . . . | 3         |
| B.4 Proof of Theorem 3 . . . . .     | 5         |
| B.5 Proof of Theorem 4 . . . . .     | 10        |
| <b>C Experiment details</b>          | <b>12</b> |

### A Auxiliary results

In this section, we present a few supporting results. The first result is a path independence lemma for perturbations of eigenvectors. It first appeared in [7]; the eigengap condition in the statement of the Lemma is justified in [1, Lemma 5].

**Lemma A.1** (Path independence). *Let  $A \in \mathbb{R}^{d \times d}$  be a fixed symmetric matrix and let  $\hat{A} := A + E$ , where  $E$  is a symmetric perturbation. Suppose that we can write*

$$\hat{A} - A = E_0 + E_1 = F_0 + F_1,$$

*where  $E_0, E_1, F_0, F_1$  are symmetric matrices, and define the intermediate matrices*

$$\hat{A}_1 := A + E_0, \hat{A}_2 = \hat{A}_1 + E_1, \quad \tilde{A}_1 := A + F_0, \tilde{A}_2 = \tilde{A}_1 + F_1.$$

*Fix any  $V \in O(d, r)$  whose columns span the principal  $r$ -dimensional invariant subspace of  $A$  and construct the leading eigenvector matrices  $\hat{V}_1, \hat{V}_2 \in O(d, r)$  of  $\hat{A}_1$  and  $\hat{A}_2$  such that*

$$\min_{U \in \mathbb{O}_r} \|\hat{V}_1 U - V\|_F = \|\hat{V}_1 - V\|_F, \quad \min_{U \in \mathbb{O}_r} \|\hat{V}_2 U - \hat{V}_1\|_F = \|\hat{V}_2 - \hat{V}_1\|_F.$$

Further, let  $\tilde{V}_1$  and  $\tilde{V}_2$  be the leading eigenvector matrices of  $\tilde{A}_1$  and  $\tilde{A}_2$ , constructed in a similar fashion. Then,  $\hat{V}_2$  and  $\tilde{V}_2$  both span principal invariant subspaces of  $\hat{A} = A + E$ . Moreover, they satisfy

$$\hat{V}_2 = \tilde{V}_2 + T, \quad \|T\|_2 \lesssim \frac{\varepsilon^2}{\delta^2}, \quad \varepsilon := \max\{\|E_0\|_2, \|E_1\|_2, \|F_0\|_2, \|F_1\|_2\},$$

as long as  $A$  satisfies  $\delta_r(A) \geq 4\varepsilon$ .

**Lemma A.2.** Suppose that  $U \in \mathbb{O}_{d,r}$  satisfies  $\text{dist}(U, V) \leq \varepsilon < 1/2$ , where  $V$  is the principal eigenvector matrix of a symmetric matrix  $A$  with eigengap  $\delta_r(A) := \lambda_r(A) - \lambda_{r+1}(A) > 0$ . Then there exists a symmetric matrix  $B$  such that the following hold:

1.  $\|A - B\|_2 \leq 8\|A\|_2\varepsilon$  and  $\delta_r(B) = \delta_r(A)$ .
2.  $U$  is the principal eigenvector matrix of  $B$ .

*Proof.* We prove Item 1 first. To that end, we can write  $A = A_1 + A_2$ , where  $A_1 := V\Sigma_1V^\top$  and  $A_2 := V_\perp\Sigma_2V_\perp^\top$ . We consider the following matrix  $B$ :

$$B = U\Sigma_1U^\top + U_\perp\Sigma_2U_\perp^\top, \quad (1)$$

where  $U_\perp^\top U = 0$  and  $U_\perp \in \mathbb{O}_{d,d-r}$ . From (1) and the condition  $\Sigma_1 \succ \Sigma_2$ , it follows that  $U$  is a principal eigenvector matrix for  $B$ . Moreover, the gap condition on  $A$  immediately translates to the claimed gap condition for  $B$ .

It remains to bound the distance between  $A$  and  $B$ . We write

$$\|A - B\|_2 \leq \|U\Sigma_1U^\top - A_1\|_2 + \|U_\perp\Sigma_2U_\perp^\top - A_2\|_2.$$

To upper bound the first term on the right-hand side above, we use the spectral projectors  $P_U := UU^\top$  and  $P_{U_\perp} = I - P_U$  to decompose it into

$$\begin{aligned} \|U\Sigma_1U^\top - A_1\|_2 &\leq \|U\Sigma_1U^\top - P_U A_1\|_2 + \|P_{U_\perp} A_1\|_2 \\ &\leq \|U\Sigma_1U^\top - P_U A_1 P_U\|_2 + \|P_U A_1 P_{U_\perp}\|_2 + \|P_{U_\perp} A_1\|_2 \\ &\leq \|\Sigma_1 - U^\top V \Sigma_1 V^\top U\|_2 + 2\|\Sigma_1\|_2 \|P_{U_\perp} V\|_2 \\ &\leq \|\Sigma_1(I - V^\top U)\|_2 + \|(I - V^\top U)\Sigma_1 V^\top U\|_2 + 2\|\Sigma_1\|_2 \|P_{U_\perp} V\|_2 \\ &\leq 2\|\Sigma_1\|_2 \varepsilon + 4\|\Sigma_1\|_2 \varepsilon^2, \end{aligned}$$

where the last inequality follows from the inequality  $\|P_{U_\perp} V\|_2 = \text{dist}(U, V) = \varepsilon$  and Lemma A.3. A similar argument shows that  $\|U_\perp\Sigma_2U_\perp^\top - A_2\|_2 \leq 2\|\Sigma_2\|_2 \varepsilon + 4\|\Sigma_2\|_2 \varepsilon^2$ . Taking into account the bound  $\varepsilon < 1/2$  completes the proof.  $\square$

**Lemma A.3** (Modified  $\sin \theta$  distance). Let  $U, V \in O(d, r)$  satisfy  $\text{dist}(U, V) = \alpha < 1$ . Then the following holds:

$$\|I - U^\top V\|_2 \leq 2\alpha^2.$$

*Proof.* Let  $P\Sigma Q^\top$  be the singular value decomposition of  $U^\top V$ . Recall that [2, Eq. (2.5)]:

$$\Sigma = \text{diag}(\sigma_1, \dots, \sigma_r); \quad \sigma_i = \cos(\theta_i),$$

where  $\theta_i \in [0, \pi/2]$  and  $\|\sin \Theta\|_2 = \alpha$ , following [2, Lemma 2.5]. From our assumptions, it follows that

$$\begin{aligned} \|I - U^\top V\|_2 &= \|P(I - \Sigma)Q^\top\|_2 \\ &= \|I - \Sigma\|_2 \\ &= \max_{i \in [r]} \{1 - \cos(\theta_i)\} \\ &= \max_{i \in [r]} \{2\sin^2(\theta_i/2)\} \\ &\leq 2 \max_{i \in [r]} \sin^2(\theta_i) \\ &= 2\|\sin \Theta\|_2^2, \end{aligned}$$

with the last inequality following from  $0 \leq \sin(\theta/2) \leq \sin(\theta)$  for any  $\theta \in [0, \pi/2]$ .  $\square$

## B Additional proofs

This section includes proofs that were omitted from the main text.

### B.1 Proof of Proposition 1

*Proof.* Define  $\mathcal{C} := \{i \in [m] \mid \text{dist}(Y_i, V) \leq \varepsilon\}$  with  $|\mathcal{C}| > \frac{m}{2}$ . Now, we consider any pair  $(i, j)$  with  $i, j \in \mathcal{C}$ . By the triangle inequality,

$$\text{dist}(Y_i, Y_j) \leq \text{dist}(Y_i, V) + \text{dist}(Y_j, V) \leq 2\varepsilon, \quad \text{for all } i, j \in \mathcal{C}. \quad (2)$$

Now, fix  $i_*$  to be any index for which  $\text{dist}(Y_i, Y_j) \leq 2\varepsilon$  for at least  $m/2$  other indices  $j \neq i_*$  (such an index always exists because  $|\mathcal{C}| \geq \frac{m}{2} + 1$ ). For any such  $i_*$ , there must be another index  $j$  satisfying  $\text{dist}(Y_j, V) \leq \varepsilon$  and  $\text{dist}(Y_j, Y_{i_*}) \leq 2\varepsilon$ . Therefore,

$$\text{dist}(Y_{i_*}, V) \leq \text{dist}(Y_{i_*}, Y_j) + \text{dist}(Y_j, V) \leq 3\varepsilon.$$

□

### B.2 Proof of Lemma 1

*Proof.* Recall that  $V$  is an eigenvector matrix of  $A$  that satisfies

$$\min_{Z \in \mathbb{O}_r} \|V - V_{\text{ref}} Z\|_F = \|V - V_{\text{ref}}\|_F.$$

From Lemma A.2, it follows that the columns of  $V_{\text{ref}}$  span the principal eigenspace of a matrix  $B$  with nontrivial eigengap that satisfies  $\|A - B\|_2 \lesssim \|A\|_2 \varepsilon$ . We now relate  $V_i^{\text{ideal}}$  to  $V_i^{\text{corr}}$  using the aforementioned path independence result.

To that end, note that  $V_i^{\text{ideal}}$  is the leading eigenvector matrix of

$$A_i := A + (A_i - A) + 0,$$

that has been maximally aligned with  $V$  (in the sense of Frobenius distance). On the other hand, the Procrustes estimates  $V_i^{\text{corr}}$  are given by the leading eigenvector matrices of

$$A_i := A + (B - A) + (A_i - B),$$

since  $V_{\text{ref}}$  is the leading eigenvector of  $B$  nearest to  $V$  and  $V_i^{\text{corr}}$  is formed as the leading eigenvector of  $A_i$  nearest to  $V_{\text{ref}}$ . Applying Lemma A.1 with  $E_0 := A_i - A$ ,  $E_1 = \mathbf{0}$ ,  $F_0 := B - A$  and  $F_1 := A_i - B$ , we obtain

$$V_i^{\text{corr}} = V_i^{\text{ideal}} + \mathcal{O}\left(\frac{1}{\delta^2} \max\{\|A_i - A\|_2^2, \|B - A\|_2^2, \|A_i - B\|_2^2\}\right).$$

Finally, we note the following upper bound

$$\|A_i - B\|_2^2 \lesssim \|A_i - A\|_2^2 + \|A - B\|_2^2 \lesssim \max(\|A_i - A\|_2^2, \|A\|_2^2 \varepsilon^2),$$

which concludes the proof. □

### B.3 Proof of Proposition 3

*Proof.* Let  $j_{\text{crit}}$  be the smallest index for which  $2^j \geq \max\{\lambda_{\text{lb}}, \|\Sigma_{G_0}\|_2\}$ . For a fixed corruption fraction  $\alpha$  and failure probability  $p$ , define the events

$$\mathcal{E}_j := \left\{ \left\| \theta_{2^j} - \frac{1}{|G_0|} \sum_{i \in G_0} X_i \right\|_2 \leq f(2^j; p, \alpha) \right\}, \quad \mathcal{E} := \bigcap_{j=j_{\text{crit}}}^{j_{\text{hi}}} \mathcal{E}_j.$$

From Theorem 3 in the main text and a union bound, it follows that

$$\begin{aligned} \mathbb{P}(\mathcal{E}) &\geq 1 - \sum_{j \in \{j_{\text{crit}}, \dots, j_{\text{hi}}\}} \mathbb{P}\left(\left\| \theta_{2^j} - \frac{1}{|G_0|} \sum_{i \in G_0} X_i \right\|_2 \geq f(2^j; p, \alpha)\right) \\ &\geq 1 - (j_{\text{hi}} - j_{\text{crit}}) \cdot p \end{aligned}$$

$$\geq 1 - 2 \log_2 \left( \frac{\lambda_{\text{ub}}}{\lambda_{\text{lb}}} \right) p.$$

Let us write  $\theta_* := \frac{1}{|G_0|} \sum_{i \in G_0} X_i$ . Conditioned on the event  $\mathcal{E}$ , for any  $j, j' \geq j_{\text{crit}}$  we have

$$\|\theta_{2^j} - \theta_{2^{j'}}\|_2 \leq \|\theta_{2^j} - \theta_*\|_2 + \|\theta_{2^{j'}} - \theta_*\|_2 \leq f(2^j; p, \alpha) + f(2^{j'}; p, \alpha).$$

Consequently, it follows that  $2^{j_{\text{crit}}}$  satisfies the condition of the estimator, and therefore

$$\hat{\lambda} \leq 2^{j_{\text{crit}}} \leq 2 \max \{ \lambda_{\text{lb}}, \|\Sigma_{G_0}\|_2 \}.$$

Finally, the desired claim follows since

$$\begin{aligned} \|\theta_{\hat{\lambda}} - \theta_*\|_2 &\leq \|\theta_{\hat{\lambda}} - \theta_{2^{j_{\text{crit}}}}\|_2 + \|\theta_{2^{j_{\text{crit}}}} - \theta_*\|_2 \\ &\leq f(\hat{\lambda}; p, \alpha) + 2f(2^{j_{\text{crit}}}; p, \alpha) \\ &\leq 3f(2^{j_{\text{crit}}}; p, \alpha) \\ &\leq 171 \sqrt{\|\Sigma_{G_0}\|_2} \left( \alpha + \frac{4 \log(1/p)}{m} \right)^{1/2}. \end{aligned}$$

□

The next Lemma provides an upper bound on the operator norm of the empirical covariance  $\Sigma_{\mathcal{I}_{\text{good}}}$ .

**Lemma B.1.** *Suppose that  $\hat{V}_{\text{ref}}$  satisfies  $\delta_r(A) \geq 8 \text{dist}(\hat{V}_{\text{ref}}, V)$ . Then we have*

$$\|\Sigma_{\mathcal{I}_{\text{good}}}\|_2 \leq \left\| \frac{1}{|\mathcal{I}_{\text{good}}|} \sum_{i \in \mathcal{I}_{\text{good}}} V_i V_i^\top - V V^\top \right\|_2 + 2 \left\| \frac{1}{|\mathcal{I}_{\text{good}}|} \sum_{i \in \mathcal{I}_{\text{good}}} \tilde{V}_i - V \right\|_2. \quad (3)$$

*Proof.* Let  $\mu$  denote the empirical mean over  $\mathcal{I}_{\text{good}}$ . We have

$$\begin{aligned} \mu &= \frac{1}{|\mathcal{I}_{\text{good}}|} \sum_{i \in \mathcal{I}_{\text{good}}} \tilde{V}_i, \\ \Sigma_{\mathcal{I}_{\text{good}}} &= \frac{1}{|\mathcal{I}_{\text{good}}|} \sum_{i \in \mathcal{I}_{\text{good}}} (\tilde{V}_i - \mu)(\tilde{V}_i - \mu)^\top \\ &= \frac{1}{|\mathcal{I}_{\text{good}}|} \sum_{i \in \mathcal{I}_{\text{good}}} \tilde{V}_i \tilde{V}_i^\top - \mu \mu^\top \\ &= \frac{1}{|\mathcal{I}_{\text{good}}|} \sum_{i \in \mathcal{I}_{\text{good}}} \tilde{V}_i \tilde{V}_i^\top - V V^\top + V V^\top - \mu \mu^\top \\ &= \frac{1}{|\mathcal{I}_{\text{good}}|} \sum_{i \in \mathcal{I}_{\text{good}}} \tilde{V}_i \tilde{V}_i^\top - V V^\top + (V - \mu)(V + \mu)^\top, \end{aligned}$$

where  $V \in \mathbb{O}_{d,r}$  spans the principal eigenspace of  $A$  and satisfies

$$\min_{Z \in \mathbb{O}_r} \|VZ - \hat{V}_{\text{ref}}\|_F = \|V - \hat{V}_{\text{ref}}\|_F.$$

We now bound the spectral norm of  $\Sigma_{\mathcal{I}_{\text{good}}}$ . Indeed, we have

$$\begin{aligned} \|\Sigma_{\mathcal{I}_{\text{good}}}\|_2 &\leq \left\| \frac{1}{|\mathcal{I}_{\text{good}}|} \sum_{i \in \mathcal{I}_{\text{good}}} \tilde{V}_i \tilde{V}_i^\top - V V^\top \right\|_2 + \|V + \mu\|_2 \left\| \frac{1}{|\mathcal{I}_{\text{good}}|} \sum_{i \in \mathcal{I}_{\text{good}}} \tilde{V}_i - V \right\|_2 \\ &\leq \left\| \frac{1}{|\mathcal{I}_{\text{good}}|} \sum_{i \in \mathcal{I}_{\text{good}}} V_i V_i^\top - V V^\top \right\|_2 + 2 \left\| \frac{1}{|\mathcal{I}_{\text{good}}|} \sum_{i \in \mathcal{I}_{\text{good}}} \tilde{V}_i - V \right\|_2, \end{aligned}$$

using the fact that  $\tilde{V}_i \tilde{V}_i^\top = V_i V_i^\top$  for all  $i \in \mathcal{I}_{\text{good}}$ .

□

#### B.4 Proof of Theorem 3

In this section, we modify the proof of [6, Theorem 4] to derive guarantees for robust mean estimation with matrix-valued inputs. We recall some notation used therein: given the set of “good” samples  $G_0$  and the initial sample  $S_0 = \{1, \dots, m\}$ , we denote

$$\begin{aligned} S_k &= \{\text{points remaining after } k \text{ recursive calls to Filter}\}, \\ G_k &= S_k \cap G_0, \\ B_k &= S_k \setminus G_0, \\ \alpha &= \frac{m - |G_0|}{m}. \end{aligned} \tag{4}$$

Moreover, given any set  $S \subset [m]$ , we write

$$\Sigma_S := \frac{1}{|S|} \sum_{i \in S} (X_i - \mu_S)(X_i - \mu_S)^\top, \quad \text{where} \quad \mu_S := \frac{1}{|S|} \sum_{i \in S} X_i. \tag{5}$$

In our proofs, we frequently employ the total variation distance  $d_{\text{TV}}$ . For discrete distributions  $P_1, P_2$  on a common sample space  $\Omega$ ,  $d_{\text{TV}}$  is given by

$$d_{\text{TV}}(P_1, P_2) = \frac{1}{2} \|P_1 - P_2\|_1 = \frac{1}{2} \sum_{x \in \Omega} |P_1(x) - P_2(x)|. \tag{6}$$

Finally, we define the events  $\mathcal{E}_k$ , where  $k \in \mathbb{N}$ , as below:

$$\mathcal{E}_k := \left\{ \sum_{i \in G_k} \tau_i \geq \frac{1}{\gamma} \sum_{j \in S_k} \tau_j \right\}, \quad k = 0, 1, \dots \tag{7}$$

Our proof essentially traces the proof of [6, Theorem 4] but for the case of matrix-valued inputs to the `Filter` algorithm. The first result has already been shown in [6], as its proof is independent of the shape of the inputs.

**Lemma B.2** (See [6, Lemma 6]). *Let  $T := \inf \{k \in \mathbb{N} \mid \mathcal{E}_k \text{ is true}\}$ . Then we have:*

$$\mathbb{P}(T \geq 3(m - |G_0|) + 18 \log(1/p)) \leq p. \tag{8}$$

The remainder of the proof is devoted to showing that, as soon as some  $\mathcal{E}_k$  is true, `Filter` will terminate with a good estimate. Throughout, we condition on the event

$$\mathcal{E} := \{T \leq T_p\}, \quad \text{where} \quad T_p := 3(m - |G_0|) + 18 \log(1/p), \tag{9}$$

which holds with probability at least  $1 - p$ .

**Theorem B.1.** *Suppose that  $\alpha, p$  and  $N$  satisfy*

$$3\alpha + \frac{18 \log(1/p)}{m} \leq \frac{1}{4}. \tag{10}$$

*Then the following hold simultaneously with probability at least  $1 - p$ :*

1. `Filter`( $S_0, \|\Sigma_{G_0}\|_2$ ) *terminates after at most  $T_p$  iterations;*
2. *The output of `Filter`( $S_0, \|\Sigma_{G_0}\|_2$ ),  $\theta_{\|\Sigma_{G_0}\|_2}$ , satisfies*

$$\left\| \theta_{\|\Sigma_{G_0}\|_2} - \frac{1}{|G_0|} \sum_{i \in G_0} X_i \right\|_2 \leq 18\sqrt{5\|\Sigma_{G_0}\|_2} \left( \alpha + \frac{4 \log(1/p)}{m} \right)^{1/2}. \tag{11}$$

**Remark 1.** *While we prove the Theorem for the case  $\lambda_{\text{ub}} = \|\Sigma_{G_0}\|_2$ , a straightforward modification of the proof shows that when  $\lambda_{\text{ub}} \geq \|\Sigma_{G_0}\|_2$ , we have*

$$\left\| \theta_{\lambda_{\text{ub}}} - \frac{1}{|G_0|} \sum_{i \in G_0} X_i \right\|_2 \leq 18\sqrt{5\lambda_{\text{ub}}} \left( \alpha + \frac{4 \log(1/p)}{m} \right)^{1/2}.$$

*Proof of Theorem B.1.* We condition on the event  $\mathcal{E}$  from (9), which holds with probability at least  $1 - p$ . This implies that there is some index  $k \leq T_p$  such that

$$\sum_{i \in G_k} \tau_i \geq \frac{1}{\gamma} \sum_{j \in S_k} \tau_j.$$

From Lemma B.7, we obtain that the empirical covariance satisfies  $\|\Sigma_{S_k}\|_2 \leq 18 \|\Sigma_{G_0}\|_2$ , and thus the algorithm terminates after at most  $k$  steps. We have the following cases:

1. The termination condition was first triggered at the  $k^{\text{th}}$  step. In that case, Lemma B.7 directly implies the desired inequality.
2. The algorithm terminated at some index  $\ell < k$ . Then it follows from Lemma B.8 that

$$\eta := d_{\text{TV}}(\text{Unif}(S_\ell), \text{Unif}(G_0)) \leq 5\alpha + \frac{20 \log(1/p)}{N}. \quad (12)$$

At the same time, Lemma B.3 implies that

$$\left\| \theta_{\|\Sigma_{G_0}\|_2} - \frac{1}{|G_0|} \sum_{i \in G_0} X_i \right\|_2 \leq \frac{\sqrt{\eta}}{1 - \sqrt{\eta}} \cdot \left( \|\Sigma_{S_\ell}\|_2^{1/2} + \|\Sigma_{G_0}\|_2^{1/2} \right). \quad (13)$$

From the termination condition, we obtain that

$$\|\Sigma_{S_\ell}\|_2 \leq 18 \|\Sigma_{G_0}\|_2. \quad (14)$$

Combining Eqs. (12) to (14) yields the desired bound.

□

The next few Lemmas are supporting statements used in the proof of Theorem B.1.

**Lemma B.3.** *Let  $S = \{X_1, \dots, X_m\}$  where  $X_i \in \mathbb{R}^{d \times r}$  and suppose that  $P_1, P_2$  are discrete distributions supported over  $[m]$  with  $d_{\text{TV}}(P_1, P_2) = \eta$ . Then the following holds:*

$$\|\mathbb{E}_{P_1}[X_i] - \mathbb{E}_{P_2}[X_i]\|_2 \leq \frac{\sqrt{\eta}}{1 - \sqrt{\eta}} \cdot \left( \|\Sigma_{P_1}\|_2^{1/2} + \|\Sigma_{P_2}\|_2^{1/2} \right), \quad (15)$$

where the matrices  $\Sigma_{P_i}$  are defined as:

$$\Sigma_{P_i} = \mathbb{E}_{X \sim P_i} [(X - \mathbb{E}_{P_i}[X])(X - \mathbb{E}_{P_i}[X])^\top].$$

*Proof.* Following the proof of [5, Lemma 2.1], we consider a coupling between  $P_1$  and  $P_2$  such that  $\mathbb{P}(X = X') \geq 1 - \eta$ . Denoting  $\|X\|_{L^2} := \sqrt{\mathbb{E}[X^2]}$ , we have

$$\begin{aligned} \|\mathbb{E}_{P_1}[X] - \mathbb{E}_{P_2}[X']\|_2 &= \sup_{u, v \in \mathcal{B}} \langle u, (\mathbb{E}_{P_1}[X] - \mathbb{E}_{P_2}[X'])v \rangle \\ &= \sup_{u, v \in \mathcal{B}} \mathbb{E}[\langle u, (X - X')v \rangle \mathbf{1}\{X \neq X'\}] \\ &\leq \mathbb{E}[\mathbf{1}\{X \neq X'\}^2]^{1/2} \cdot \sup_{u, v \in \mathcal{B}} \mathbb{E}[\langle u, (X - X')v \rangle^2]^{1/2} \\ &\leq \sqrt{\eta} \cdot \sup_{u, v \in \mathcal{B}} \|\langle u, (X - X')v \rangle\|_{L^2}. \end{aligned} \quad (16)$$

Let  $\mu_1 := \mathbb{E}_{P_1}[X]$  and  $\mu_2 := \mathbb{E}_{P_2}[X]$ . Since  $\|\cdot\|_{L^2}$  is a norm, the triangle inequality implies that

$$\begin{aligned} \sup_{u, v \in \mathcal{B}} \|\langle u, (X - X')v \rangle\|_{L^2} &= \sup_{u, v \in \mathcal{B}} \|\langle u, (X - \mu_1 + \mu_1 - \mu_2 + \mu_2 - X')v \rangle\|_{L^2} \\ &\leq \sup_{u, v \in \mathcal{B}} \|\langle u, (X - \mu_1)v \rangle\|_{L^2} + \sup_{u, v \in \mathcal{B}} \|\langle u, (X' - \mu_2)v \rangle\|_{L^2} \\ &\quad + \sup_{u, v \in \mathcal{B}} \|\langle u, (\mu_1 - \mu_2)v \rangle\|_{L^2}. \end{aligned} \quad (17)$$

We now upper bound the remaining terms. For the first one, we have

$$\begin{aligned}
\sup_{u,v \in \mathcal{B}} \|\langle u, (X - \mu_1)v \rangle\|_{L^2} &= \sup_{u,v \in \mathcal{B}} \mathbb{E} [\langle u, (X - \mu_1)v \rangle^2]^{1/2} \\
&= \sup_{u,v \in \mathcal{B}} \mathbb{E} [\text{Tr}(u^\top (X - \mu_1) \underbrace{vv^\top}_{\preceq I_d} (X - \mu_1)^\top u)]^{1/2} \\
&\leq \sup_{u \in \mathcal{B}} \mathbb{E} [\text{Tr}(u^\top (X - \mu_1)(X - \mu_1)^\top u)]^{1/2} \\
&= \left( \sup_{u \in \mathcal{B}} \langle u, \mathbb{E} [(X - \mu_1)(X - \mu_1)^\top] u \rangle \right)^{1/2} \\
&= \|\Sigma_{P_1}\|_2^{1/2}, \tag{18}
\end{aligned}$$

where the penultimate equality uses linearity of the trace operator and the last equality is the definition of the spectral norm for symmetric positive semidefinite matrices. Similar arguments also yield

$$\sup_{u,v \in \mathcal{B}} \|\langle u, (X' - \mu_2)v \rangle\|_{L^2} \leq \|\Sigma_{P_2}\|_2^{1/2}, \tag{19}$$

$$\sup_{u,v \in \mathcal{B}} \|\langle u, (\mu_1 - \mu_2)v \rangle\|_{L^2} \leq \|\mathbb{E}_{P_1}[X] - \mathbb{E}_{P_2}[X']\|_2. \tag{20}$$

Plugging Eqs. (17) to (20) back into Eq. (16) and rearranging yields the expected result:

$$\|\mathbb{E}_{P_1}[X] - \mathbb{E}_{P_2}[X']\|_2 \leq \frac{\sqrt{\eta}}{1 - \sqrt{\eta}} \left( \|\Sigma_{P_1}\|_2^{1/2} + \|\Sigma_{P_2}\|_2^{1/2} \right).$$

□

**Lemma B.4.** Let  $G \subset S \subset [m]$ . Moreover, let  $\mu_S$  and  $\mu_G$  be their respective empirical means, and let  $v$  be the leading eigenvector of  $\Sigma_S$  so that the outlier scores satisfy

$$\tau_i = \langle v, (X_i - \mu_S)(X_i - \mu_S)^\top v \rangle, \quad \forall i \in S.$$

Moreover, define  $\eta := 1 - |G|/|S|$  and fix a  $\gamma \in (0, 1/\eta)$ . Then, we have the implication

$$\|\Sigma_S\|_2 \geq (1 - \eta)^2 \left( \frac{\gamma}{1 - \gamma\eta} \right) \|\Sigma_G\|_2 \implies \sum_{j \in G} \tau_j \leq \frac{1}{\gamma} \sum_{i \in S} \tau_i. \tag{21}$$

*Proof.* Recall that the (normalized) sum of outlier scores over the set  $G$  is given by

$$\begin{aligned}
\frac{1}{|G|} \left\langle v, \sum_{i \in G} (X_i - \mu_S)(X_i - \mu_S)^\top v \right\rangle &= \frac{1}{|G|} \left\langle v, \sum_{i \in G} (X_i - \mu_G)(X_i - \mu_G)^\top v \right\rangle \\
&\quad + \langle v, (\mu_S - \mu_G)(\mu_S - \mu_G)^\top v \rangle \\
&= \langle v, \Sigma_G v \rangle + \langle v, (\mu_S - \mu_G)(\mu_S - \mu_G)^\top v \rangle. \tag{22}
\end{aligned}$$

We now simplify the second term. Indeed, we have

$$\begin{aligned}
\mu_S - \mu_G &= \frac{1}{|S|} \sum_{i \in G} X_i + \frac{1}{|S|} \sum_{i \in S \setminus G} X_i - \frac{1}{|G|} \sum_{i \in G} X_i \\
&= \left( 1 - \frac{|G|}{|S|} \right) (\mu_{S \setminus G} - \mu_G)
\end{aligned} \tag{23}$$

For brevity, denote  $\eta := \frac{|S \setminus G|}{|S|}$ . Plugging (23) back into (22), we obtain

$$\frac{1}{|G|} \sum_{j \in G} \tau_j = \langle v, \Sigma_G v \rangle + \eta^2 \langle v, (\mu_{S \setminus G} - \mu_G)(\mu_{S \setminus G} - \mu_G)^\top v \rangle \tag{24}$$

We now bound the second term in (24). From [3, Lemma 2.4], it follows that

$$\langle v, \Sigma_S v \rangle = (1 - \eta) \langle v, \Sigma_G v \rangle + \eta \langle v, \Sigma_{S \setminus G} v \rangle + \eta(1 - \eta) \langle v, (\mu_{S \setminus G} - \mu_G)(\mu_{S \setminus G} - \mu_G)^\top v \rangle$$

Rearranging and multiplying by  $\eta/(1-\eta)$  gives

$$\begin{aligned}\eta^2 \langle v, (\mu_{S \setminus G} - \mu_G)(\mu_{S \setminus G} - \mu_G)^\top v \rangle &= \frac{\eta}{1-\eta} \langle v, \Sigma_S v \rangle - \eta \langle v, \Sigma_G v \rangle - \frac{\eta^2}{(1-\eta)} \langle v, \Sigma_{S \setminus G} v \rangle \\ &\leq \frac{\eta}{1-\eta} \langle v, \Sigma_S v \rangle - \eta \langle v, \Sigma_G v \rangle.\end{aligned}$$

Plugging back into Eq. (24) and using the fact that  $|G| = |S|(1-\eta)$ , we obtain

$$\begin{aligned}\sum_{j \in G} \tau_j &\leq |G|(1-\eta) \langle v, \Sigma_G v \rangle + \frac{|G|\eta}{1-\eta} \langle v, \Sigma_S v \rangle \\ &\leq |G|(1-\eta) \|\Sigma_G\|_2 + (|S| - |G|) |S| \|\Sigma_S\|_2\end{aligned}\tag{25}$$

Finally, replacing  $|G| = |S|(1-\eta)$  in (25) and rearranging, we obtain

$$\|\Sigma_G\|_2 \leq (\gamma^{-1} - \eta) \frac{\|\Sigma_S\|_2}{(1-\eta)^2} \implies \sum_{j \in G} \tau_j \leq \frac{1}{\gamma} \sum_{i \in S} \tau_i.$$

□

**Lemma B.5.** Suppose that (10) is true. Then the following holds for any  $k \leq T_p$ .

$$\frac{|S_k \setminus G_k|}{|S_k|} \leq \frac{4\alpha}{3}.$$

*Proof.* Recall that  $B_k = S_k \setminus G_k$  and notice that

$$\frac{|B_k|}{|S_k|} = \frac{|B_k|}{|S_0|} \frac{|S_0|}{|S_k|} \leq \frac{|B_0|}{|S_0|} \frac{|S_0|}{|S_0| - T_p} = \alpha \cdot \frac{1}{1 - (3\alpha + \frac{18 \log(1/p)}{m})} \leq \frac{4\alpha}{3},$$

where the first inequality follows from the fact that  $|B_k| \leq |B_0|$ . □

**Lemma B.6.** For any integer  $k$ , the sets  $G_k$  and  $G_0$  satisfy

$$\|\Sigma_{G_k}\|_2 \leq \frac{|G_0|}{|G_k|} \|\Sigma_{G_0}\|_2\tag{26}$$

*Proof.* We expand the definition of  $\Sigma_{G_0}$  and rewrite:

$$\begin{aligned}\Sigma_{G_0} &= \frac{1}{|G_0|} \sum_{i \in G_0} (X_i - \mu_{G_0})(X_i - \mu_{G_0})^\top \\ &= \underbrace{\frac{1}{|G_0|} \sum_{i \in G_k} (X_i - \mu_{G_0})(X_i - \mu_{G_0})^\top}_{T_1} + \underbrace{\frac{1}{|G_0|} \sum_{i \in G_0 \setminus G_k} (X_i - \mu_{G_0})(X_i - \mu_{G_0})^\top}_{T_2}\end{aligned}$$

We now rewrite the first term in the above sum using

$$\begin{aligned}T_1 &= \frac{1}{|G_0|} \sum_{i \in G_k} (X_i - \mu_{G_k} + \mu_{G_k} - \mu_{G_0})(X_i - \mu_{G_k} + \mu_{G_k} - \mu_{G_0})^\top \\ &= \frac{|G_k|}{|G_0|} \Sigma_{G_k} + \frac{|G_k|}{|G_0|} \left( \frac{1}{|G_k|} \sum_{i \in G_k} (X_i - \mu_{G_k}) \right) (\mu_{G_k} - \mu_{G_0})^\top \\ &\quad + \frac{|G_k|}{|G_0|} (\mu_{G_k} - \mu_{G_0}) \left( \frac{1}{|G_k|} \sum_{i \in G_k} X_i - \mu_{G_k} \right)^\top + \frac{|G_k|}{|G_0|} (\mu_{G_k} - \mu_{G_0})(\mu_{G_k} - \mu_{G_0})^\top \\ &= \frac{|G_k|}{|G_0|} (\Sigma_{G_k} + (\mu_{G_k} - \mu_{G_0})(\mu_{G_k} - \mu_{G_0})^\top)\end{aligned}$$

Letting  $v \in \mathbb{S}^{d-1}$  and using the fact that  $T_2$  is positive semidefinite, we arrive at

$$\langle v, \Sigma_{G_0} v \rangle = \frac{|G_k|}{|G_0|} \left( \langle v, \Sigma_{G_k} v \rangle + \|(\mu_{G_k} - \mu_{G_0})^\top v\|^2 \right) + \langle v, T_2 v \rangle \geq \frac{|G_k|}{|G_0|} \langle v, \Sigma_{G_k} v \rangle\tag{27}$$

Finally, taking suprema over both sides yields the desired inequality. □

**Lemma B.7.** Suppose that (10) is true and that the following inequality holds for some index  $k \leq T_p$ :

$$\sum_{i \in G_k} \tau_i \geq \frac{1}{\gamma} \sum_{j \in S_k} \tau_j. \quad (28)$$

Then the empirical means satisfy

$$\|\mathbb{E}_{\text{Unif}(G_0)}[X] - \mathbb{E}_{\text{Unif}(S_k)}[X]\|_2 \leq 18 \left( 5\alpha + \frac{20 \log(1/p)}{m} \right)^{1/2} \|\Sigma_{G_0}\|_2^{1/2}.$$

*Proof.* Let  $P_1 := \text{Unif}(G_0)$  and  $P_2 := \text{Unif}(S_k)$ . From Lemma B.3, it follows that

$$\|\mathbb{E}_{P_1}[X] - \mathbb{E}_{P_2}[X]\|_2 \leq \frac{\sqrt{d_{\text{TV}}(P_1, P_2)}}{1 - \sqrt{d_{\text{TV}}(P_1, P_2)}} \cdot \left( \|\Sigma_{G_0}\|_2^{1/2} + \|\Sigma_{G_k}\|_2^{1/2} \right). \quad (29)$$

Since (28) is the reverse of (21), we obtain

$$\begin{aligned} \|\Sigma_{S_k}\|_2 &\leq (1 - \eta)^2 \frac{\gamma}{1 - \gamma\eta} \|\Sigma_{G_k}\|_2 \\ &\leq \frac{3}{1 - 6\alpha} \|\Sigma_{G_k}\|_2 \\ &\leq 6 \cdot \frac{|G_0|}{|G_k|} \|\Sigma_{G_0}\|_2, \end{aligned}$$

where the first inequality follows from the contrapositive of Lemma B.4, the second inequality from  $\gamma = 3$  and Lemma B.5, and the last inequality follows by our assumption on  $\alpha$ . Now, let  $K \leq T_p$  be the number of samples in  $G_0$  that were removed by the algorithm. We have

$$\frac{|G_0|}{|G_k|} = \frac{m - |B_0|}{m - |B_0| - K} \leq \frac{m - |B_0|}{m - |B_0| - T_p} \leq \frac{m - |B_0|}{m - 18 \log(1/p) - 4|B_0|} = \frac{1 - \alpha}{1 - 4\alpha - \frac{18 \log(1/p)}{m}}$$

From (10), we additionally have that

$$1 - \left( 4\alpha + \frac{18 \log(1/p)}{m} \right) \geq 1 - \frac{4}{3} \left( 3\alpha + \frac{18 \log(1/p)}{m} \right) \geq \frac{1}{3} \implies \|\Sigma_{S_k}\|_2 \leq 18 \|\Sigma_{G_0}\|_2.$$

Substituting the above into (29) and using Lemma B.8 yields the desired bound:

$$\begin{aligned} \|\mathbb{E}_{P_1}[X] - \mathbb{E}_{P_2}[X]\|_2 &\leq \frac{\left( 5\alpha + \frac{20 \log(1/p)}{m} \right)^{1/2}}{1 - \left( 5\alpha + \frac{20 \log(1/p)}{m} \right)^{1/2}} \left( \|\Sigma_{G_0}\|_2^{1/2} + \sqrt{18} \|\Sigma_{G_0}\|_2^{1/2} \right) \\ &\leq 18 \left( 5\alpha + \frac{20 \log(1/p)}{m} \right)^{1/2} \|\Sigma_{G_0}\|_2^{1/2}. \end{aligned}$$

□

**Lemma B.8.** Suppose  $k \leq T_p$  and (10) holds. Then we have that

$$d_{\text{TV}}(\text{Unif}(S_k), \text{Unif}(G_0)) \leq 5\alpha + \frac{20 \log(1/p)}{m}. \quad (30)$$

*Proof.* We let  $P_1 := \text{Unif}(S_k)$ ,  $P_2 := \text{Unif}(G_0)$  and  $P_3 := \text{Unif}(G_k)$ , and write  $K \leq k \leq T_p$  for the number of samples originally in  $G_0$  that were removed by the Filter algorithm by the  $k^{\text{th}}$  step. From the triangle inequality, it follows that

$$\begin{aligned} d_{\text{TV}}(P_1, P_2) &\leq d_{\text{TV}}(P_1, P_3) + d_{\text{TV}}(P_2, P_3) \\ &= \frac{|S_k| - |G_k|}{|S_k|} + \frac{|G_0| - |G_k|}{|G_0|} \\ &= \frac{m - k - (m - |B_0| - K)}{m - k} + \frac{K}{m - |B_0|} \end{aligned}$$

$$\begin{aligned}
&= \frac{|B_0| + (K - k)}{m - k} + \frac{K}{m - |B_0|} \\
&\leq \frac{|B_0|}{m - k} + \frac{T_p}{m - |B_0|} \\
&\leq \frac{|B_0|}{m - T_p} + \frac{T_p}{m - |B_0|},
\end{aligned}$$

where the second line follows from Lemma B.9 and the last two inequalities follow from  $K \leq m$  and  $m \leq T_p$ . Finally, using Lemma B.2 and Eq. (10), we obtain

$$\begin{aligned}
\frac{|B_0|}{m - T_p} + \frac{T_p}{m - |B_0|} &= \frac{\alpha}{1 - \frac{T_p}{m}} + \frac{\frac{T_p}{m}}{1 - \alpha} \\
&\leq \frac{\alpha}{1 - \frac{18 \log(1/p)}{m} - 3\alpha} + \frac{\frac{18 \log(1/p)}{m} + 3\alpha}{1 - \alpha} \\
&\leq \frac{4\alpha}{3} + \frac{\frac{18 \log(1/p)}{m} + 3\alpha}{1 - \alpha} \\
&\leq \frac{4\alpha}{3} + \frac{\frac{18 \log(1/p)}{m} + 3\alpha}{1 - \frac{1}{12}} \\
&\leq 5\alpha + \frac{20 \log(1/p)}{m}.
\end{aligned}$$

□

**Lemma B.9.** Consider a pair of discrete sets  $S, S'$  such that  $S' \subset S$ . We have:

$$d_{\text{TV}}(\text{Unif}(S), \text{Unif}(S')) = \frac{|S| - |S'|}{|S|}. \quad (31)$$

*Proof.* Using the fact that  $d_{\text{TV}}(p, q) = \frac{1}{2} \|p - q\|_1$ , we have:

$$\begin{aligned}
d_{\text{TV}}(\text{Unif}(S), \text{Unif}(S')) &= \frac{1}{2} \left( \sum_{x \in S \cap S'} \left| \frac{1}{|S|} - \frac{1}{|S'|} \right| + \sum_{x \in S \setminus S'} \frac{1}{|S|} \right) \\
&= \frac{1}{2} \left( 1 - \frac{|S'|}{|S|} + \frac{|S| - |S'|}{|S|} \right) \\
&= 1 - \frac{|S'|}{|S|}.
\end{aligned}$$

□

## B.5 Proof of Theorem 4

We now present the proof of the main theorem on distributed PCA. We first recall that

$$A_i = \frac{1}{n} \sum_{j=1}^n X_j^{(i)} (X_j^{(i)})^\top; \quad i \in \mathcal{I}_{\text{good}},$$

where  $X_j^{(i)} \stackrel{\text{iid}}{\sim} \mathcal{P}$ , and that the responses  $V_i \in \mathbb{O}_{d,r}$  span the leading  $r$ -dimensional eigenspace of  $A_i$ . Under this model, the local errors  $E_i := A_i - A$  as well as the error of the empirical average over the inliers are bounded with high probability. We will condition on the following events for the remainder of this section:

$$\begin{aligned}
\mathcal{E}_1 &= \left\{ \max_{i \in \mathcal{I}_{\text{good}}} \|A_i - A\|_2 \leq \min \left\{ \frac{\delta}{8}, C_1 \|A\|_2 \sqrt{\frac{r_* + \log(m/p)}{n}} \right\} \right\}, \\
\mathcal{E}_2 &= \left\{ \left\| \frac{1}{|\mathcal{I}_{\text{good}}|} \sum_{i \in \mathcal{I}_{\text{good}}} A_i - A \right\|_2 \leq C_2 \|A\|_2 \sqrt{\frac{r_* + \log(n)}{|\mathcal{I}_{\text{good}}| n}} \right\}.
\end{aligned} \quad (32)$$

**Lemma B.10.** Suppose that  $n \gtrsim \kappa^2 \cdot (r_\star + \log(mn/p))$ . Then the following hold:

$$\mathbb{P}(\mathcal{E}_1) \leq p, \quad \mathbb{P}(\mathcal{E}_2) \leq \frac{2}{n}. \quad (33)$$

*Proof.* The bound on  $\mathbb{P}(\mathcal{E}_2)$  in Eq. (33) follows from an application of [8, Exercise 9.2.5] and the assumed lower bound on  $n$ . On the other hand, the same result yields

$$\mathbb{P}\left(\|A_i - A\|_2 \geq C_1 \|A\|_2 \left(\sqrt{\frac{r_\star + \log(m/p)}{n}} + \frac{r_\star + \log(m/p)}{n}\right)\right) \leq \frac{p}{m},$$

for any fixed  $i \in \mathcal{I}_{\text{good}}$ . From the lower bound on  $n$ , it follows that

$$\frac{r_\star + \log(m/p)}{n} \leq \sqrt{\frac{r_\star + \log(m/p)}{n}} \quad \text{and} \quad C_1 \|A\|_2 \sqrt{\frac{r_\star + \log(m/p)}{n}} < \frac{\delta}{8}.$$

Finally, taking a union bound over  $\mathcal{I}_{\text{good}}$  recovers the bound on  $\mathbb{P}(\mathcal{E}_1)$ .  $\square$

An immediate corollary is a bound on the error of `RobustReferenceEstimator`.

**Corollary B.1.** There is a universal constant  $C_{\text{ref}}$  such that the output of Alg. 2 satisfies

$$\text{dist}(\widehat{V}_{\text{ref}}, V) \leq C_{\text{ref}} \kappa \cdot \sqrt{\frac{r_\star + \log(m/p)}{n}}.$$

*Proof.* From the bound  $\alpha < \frac{1}{2}$  and the conditioning on  $\mathcal{E}_1$ , we deduce the existence of an index set  $S'$  such that  $|S'| > \frac{m}{2}$ , and

$$\text{dist}(\widehat{V}_i, V) \leq \frac{\|A_i - A\|_2}{\delta - \frac{\delta}{4}} \leq \frac{2C_1 \|A\|_2}{\delta} \sqrt{\frac{r_\star + \log(m/p)}{n}}, \quad \text{for all } i \in S',$$

where the first bound on  $\text{dist}(\widehat{V}_i, V)$  follows from the Davis-Kahan theorem [2, Theorem 2.7] and the fact that  $\|A_i - A\|_2 \leq \frac{\delta}{8}$  for any  $i \notin \mathcal{I}_{\text{bad}}$ . From Proposition 1 in the main text, it follows that

$$\text{dist}(\widehat{V}_{\text{ref}}, V) \leq \underbrace{6C_1}_{C_{\text{ref}}} \frac{\|A\|_2}{\delta} \sqrt{\frac{r_\star + \log(m/p)}{n}}.$$

$\square$

The next Proposition instantiates the bounds of Lemma B.1 for the case of distributed PCA.

**Proposition B.1.** In the setting of Lemma B.1, the matrix  $\Sigma_{\mathcal{I}_{\text{good}}}$  satisfies

$$\|\Sigma_{\mathcal{I}_{\text{good}}}\|_2 \lesssim \kappa \sqrt{\frac{r(r_\star + \log(n))}{(1-\alpha)mn}} + \kappa^2 \cdot \frac{\sqrt{r}(r_\star + \log(n))}{n} + \kappa^4 \cdot \frac{r_\star + \log(m/p)}{n}. \quad (34)$$

*Proof.* From Lemma B.1, it follows that

$$\|\Sigma_{\mathcal{I}_{\text{good}}}\|_2 \leq \left\| \frac{1}{|\mathcal{I}_{\text{good}}|} \sum_{i \in \mathcal{I}_{\text{good}}} V_i V_i^\top - V V^\top \right\|_2 + 2 \cdot \left\| \frac{1}{|\mathcal{I}_{\text{good}}|} \sum_{i \in \mathcal{I}_{\text{good}}} \widetilde{V}_i - V \right\|_2$$

From Proposition 2 in the main text and conditioning  $\mathcal{E}_1$  and  $\mathcal{E}_2$ , we have

$$\begin{aligned} \left\| \frac{1}{|\mathcal{I}_{\text{good}}|} \sum_{i \in \mathcal{I}_{\text{good}}} \widetilde{V}_i - V \right\|_2 &\lesssim \frac{1}{\delta} \left\| \frac{1}{|\mathcal{I}_{\text{good}}|} \sum_{i \in \mathcal{I}_{\text{good}}} A_i - A \right\|_2 \\ &\quad + \left( \frac{\|A\|_2}{\delta} \right)^2 \max \left( C_1^2, C_{\text{ref}}^2 \left( \frac{\|A\|_2}{\delta} \right)^2 \right) \cdot \frac{r_\star + \log(m/p)}{n} \\ &\leq C_2 \kappa \sqrt{\frac{r_\star + \log(n)}{(1-\alpha)mn}} + \kappa^2 \max(C_1^2, C_{\text{ref}}^2 \kappa^2) \cdot \frac{r_\star + \log(m/p)}{n} \end{aligned}$$

$$\lesssim \kappa \sqrt{\frac{r_* + \log(n)}{(1-\alpha)mn}} + \kappa^4 \cdot \frac{r_* + \log(m/p)}{n}. \quad (35)$$

On the other hand, using [4, Theorem 2], we have that

$$\left\| \frac{1}{|\mathcal{I}_{\text{good}}|} \sum_{i \in \mathcal{I}_{\text{good}}} V_i V_i^\top - V V^\top \right\|_2 \lesssim \kappa \sqrt{\frac{r(r_* + \log(n))}{(1-\alpha)mn}} + \kappa^2 \frac{\sqrt{r}(r_* + \log(n))}{n}.$$

Putting all the bounds together yields (34).  $\square$

We now invoke Proposition 3 and recall that  $\varrho$  is defined as

$$\varrho := \kappa \sqrt{\frac{r(r_* + \log(n))}{(1-\alpha)mn}} + \kappa^2 \cdot \frac{\sqrt{r}(r_* + \log(n))}{n} + \kappa^4 \cdot \frac{r_* + \log(m/p)}{n} \quad (36)$$

From that and Proposition B.1, it follows that Alg. 5 from the main text invoked with  $\lambda_{\text{lb}} = \omega := \sqrt{1/mn}$  and  $\lambda_{\text{ub}} = 6$  outputs an estimate satisfying

$$\left\| \bar{V} - \frac{1}{|\mathcal{I}_{\text{good}}|} \sum_{i \in \mathcal{I}_{\text{good}}} \tilde{V}_i \right\|_2 \lesssim \sqrt{\max\{\varrho, \omega\}} \cdot \left( \alpha + \frac{\log(1/p)}{m} \right)^{1/2} \quad (37)$$

$$= \sqrt{\varrho} \cdot \left( \alpha + \frac{\log(1/p)}{m} \right)^{1/2} \quad (38)$$

with failure probability at most  $2 \log_2(6/\omega)p$ . Finally, from Eqs. (35) and (38) it follows that

$$\begin{aligned} \|\bar{V} - V\|_2 &\leq \left\| \bar{V} - \frac{1}{|\mathcal{I}_{\text{good}}|} \sum_{i \in \mathcal{I}_{\text{good}}} \tilde{V}_i \right\|_2 + \left\| \frac{1}{|\mathcal{I}_{\text{good}}|} \sum_{i \in \mathcal{I}_{\text{good}}} \tilde{V}_i - V \right\|_2 \\ &\lesssim \sqrt{\varrho} \left( \alpha + \frac{\log(1/p)}{m} \right)^{1/2} + \kappa \sqrt{\frac{r(r_* + \log(n))}{(1-\alpha)mn}} + \kappa^4 \frac{\sqrt{r}(r_* + \log(m/p))}{n}. \end{aligned}$$

In particular, the success probability is at least (given that  $\omega$  is set as  $\sqrt{1/mn}$ ):

$$1 - p - \frac{2}{n} - 2 \log_2 \left( \frac{6}{\omega} \right) p \geq 1 - \frac{2}{n} - 2 \log_2(6mn)p.$$

Letting  $p := \frac{p'}{2 \log_2(6mn)}$  and relabeling  $p' \rightarrow p$  yields the result.

## C Experiment details

The numerical experiments in the main text were coded in Julia and run on a machine with Intel(R) Core(TM) i7-7700 CPU, 16GB of RAM and a GNU/Linux environment. The code is attached as part of the supplementary material and consists of a library called `RobustDistributedPCA.jl` and a subfolder `scripts/` that contains the scripts reproducing the experiments in the manuscript. We refer the reader to the included `README.md` file for installation and usage instructions.

**Notes on implementation.** Our implementations of the `Filter` and `AdaptiveFilter` algorithms deviate from the theory in the following ways:

1. In `Filter`, we remove the point with the largest outlier score by default:

$$Z := \operatorname{argmax}_{j \in S} \tau_j.$$

The randomized selection can be enabled by passing `randomized = true` to the appropriate function. Please see the attached `README.md` file for details.

2. The error proxy  $f(\lambda; p, \alpha)$  we use in `AdaptiveFilter` has been simplified to

$$f(\lambda; p, \alpha) \equiv f(\lambda; \alpha) = \sqrt{\lambda\alpha}.$$

The reason is twofold: on one hand, we suspect that many of the constants involved in the original definition of  $f$  are artifacts of our proof and are much lower in practice; on the other hand, since the default behavior of `Filter` is not randomized, the term owing to failure probability in  $f$  can be removed.

3. Finally, we change the stopping condition of `AdaptiveFilter` to  $\lambda \leq \lambda_{\text{ub}}$  in order to simplify constants. As the value of  $\lambda_{\text{ub}}$  is determined adaptively, this does not affect the output of the algorithm.

## References

- [1] Vasileios Charisopoulos, Austin R. Benson, and Anil Damle. Communication-efficient distributed eigenspace estimation. *SIAM Journal on Mathematics of Data Science*, 3(4):1067–1092, 2021.
- [2] Yuxin Chen, Yuejie Chi, Jianqing Fan, and Cong Ma. Spectral methods for data science: A statistical perspective. *Foundations and Trends® in Machine Learning*, 14(5):566–806, 2021.
- [3] Ilias Diakonikolas and Daniel M. Kane. Recent Advances in Algorithmic High-Dimensional Robust Statistics. *arXiv e-prints*, page arXiv:1911.05911, 2019, 1911.05911.
- [4] Jianqing Fan, Dong Wang, Kaizheng Wang, and Ziwei Zhu. Distributed estimation of principal eigenspaces. *Ann. Statist.*, 47(6):3009–3031, 12 2019.
- [5] Praveesh K. Kothari and David Steurer. Outlier-robust moment-estimation via sum-of-squares. *arXiv e-prints*, page arXiv:1711.11581, 2017, 1711.11581.
- [6] Adarsh Prasad, Sivaraman Balakrishnan, and Pradeep Ravikumar. A Unified Approach to Robust Mean Estimation. *arXiv e-prints*, page arXiv:1907.00927, 2019, 1907.00927.
- [7] G. W. Stewart. Smooth local bases for perturbed eigenspaces. Technical Report TR-5010, University of Maryland, Institute for Advanced Computer Studies, 2012.
- [8] Roman Vershynin. *High-Dimensional Probability: An introduction with applications in data science*, volume 47 of *Cambridge Series in Statistical & Probabilistic Mathematics*. Cambridge University Press, 2018.
